# Supplementary material
Source: publisher figshare collection journal article supplement (https://springernature.figshare.com/ndownloader/files/28435347)
Supplement: Supplementary file 1 [file 28435347]

datetime	id	power	voltage
1563212254	115609	0	0
1563212314	115609	0	222
1563212374	115609	0	224
1563212434	115609	0	224
1563212494	115609	0	225
1563212554	115609	0	224
1563212614	115609	0	224
1563212674	115609	0	224
1563212734	115609	0	223
1563212794	115609	0	224
1563212854	115609	0	224
1563212914	115609	0	224
1563212974	115609	0	224
1563213034	115609	0	224
1563213094	115609	0	224
1563213154	115609	0	224
1563213214	115609	0	225
1563213274	115609	0	226
1563213334	115609	0	225
1563213338	139562	0	0
1563213394	115609	0	224
1563213398	139562	0	42
1563213454	115609	0	225
1563213458	139562	0	6
1563213514	115609	0	225
1563213518	139562	0	6
1563213574	115609	689	223
1563213578	139562	0	6
1563213634	115609	1099	222
1563213638	139562	0	6
1563213694	115609	1092	222
1563213698	139562	0	6
1563213754	115609	915	222
1563213758	139562	0	6
1563213814	115609	0	225
1563213818	139562	0	6
1563213874	115609	0	225
1563213878	139562	0	6
1563213934	115609	0	225
1563213938	139562	0	6
1563213994	115609	0	226
1563213998	139562	0	6
1563214054	115609	0	226
1563214058	139562	0	6
1563214114	115609	0	226
1563214118	139562	0	6
1563214174	115609	0	226
1563214178	139562	0	6
1563214234	115609	0	226
1563214238	139562	0	6
1563214294	115609	0	226
1563214298	139562	0	6
1563214354	115609	0	225
1563214358	139562	0	6
1563214414	115609	0	225
1563214418	139562	0	6
1563214474	115609	0	224
1563214478	139562	0	6
1563214534	115609	0	225
1563214538	139562	0	6
1563214594	115609	0	225
1563214598	139562	0	6
1563214654	115609	0	226
1563214658	139562	0	6
1563214714	115609	0	225
1563214718	139562	0	6
1563214774	115609	0	224
1563214778	139562	0	6
1563214834	115609	0	224
1563214838	139562	0	6
1563214894	115609	0	224
1563214898	139562	0	6
1563214954	115609	0	223
1563214958	139562	0	6
1563215014	115609	0	224
1563215018	139562	0	6
1563215074	115609	0	224
1563215078	139562	0	6
1563215134	115609	0	225
1563215138	139562	0	6
1563215194	115609	0	225
1563215198	139562	0	6
1563215254	115609	0	224
1563215258	139562	0	6
1563215314	115609	0	223
1563215318	139562	0	6
1563215374	115609	0	223
1563215378	139562	0	6
1563215434	115609	0	223
1563215438	139562	0	6
1563215494	115609	0	224
1563215498	139562	0	6
1563215554	115609	0	223
1563215558	139562	0	6
1563215614	115609	0	224
1563215618	139562	0	6
1563215674	115609	0	224
1563215678	139562	0	6
1563215734	115609	0	224
1563215738	139562	0	6
1563215794	115609	0	224
1563215798	139562	0	6
1563215855	115609	0	224
1563215858	139562	0	6
1563215915	115609	0	224
1563215918	139562	0	6
1563215975	115609	0	224
1563215978	139562	0	6
1563216035	115609	0	224
1563216038	139562	0	6
1563216095	115609	0	225
1563216098	139562	0	6
1563216155	115609	0	227
1563216158	139562	0	6
1563216215	115609	0	227
1563216218	139562	0	6
1563216275	115609	0	227
1563216278	139562	0	6
1563216335	115609	0	227
1563216338	139562	0	6
1563216395	115609	0	227
1563216398	139562	0	6
1563216455	115609	0	227
1563216458	139562	0	6
1563216515	115609	0	227
1563216518	139562	0	6
1563216575	115609	0	227
1563216578	139562	0	6
1563216635	115609	0	227
1563216638	139562	0	6
1563216695	115609	0	227
1563216698	139562	0	6
1563216755	115609	0	226
1563216758	139562	0	6
1563216815	115609	0	227
1563216818	139562	0	6
1563216875	115609	0	227
1563216878	139562	0	6
1563216935	115609	0	226
1563216939	139562	0	6
1563216995	115609	0	227
1563216999	139562	0	6
1563217055	115609	0	225
1563217059	139562	0	6
1563217115	115609	0	224
1563217119	139562	0	6
1563217175	115609	0	225
1563217179	139562	0	6
1563217235	115609	0	225
1563217239	139562	0	6
1563217295	115609	0	226
1563217299	139562	0	6
1563217355	115609	0	226
1563217359	139562	0	6
1563217415	115609	0	226
1563217419	139562	0	6
1563217475	115609	0	226
1563217479	139562	0	6
1563217535	115609	0	226
1563217539	139562	0	6
1563217595	115609	0	226
1563217599	139562	0	6
1563217662	115609	0	0
1563217659	139562	0	6
1563217722	115609	0	224
1563217719	139562	0	6
1563217782	115609	0	227
1563217779	139562	0	6
1563217842	115609	0	227
1563217839	139562	0	6
1563217902	115609	0	227
1563217899	139562	0	6
1563217962	115609	0	227
1563217959	139562	0	6
1563218022	115609	0	226
1563218019	139562	0	6
1563218082	115609	0	226
1563218079	139562	0	6
1563218142	115609	0	225
1563218139	139562	0	6
1563218202	115609	0	226
1563218199	139562	0	6
1563218262	115609	0	226
1563218259	139562	0	6
1563218322	115609	0	226
1563218319	139562	0	6
1563218382	115609	0	225
1563218379	139562	0	6
1563218442	115609	0	225
1563218439	139562	0	6
1563218502	115609	0	225
1563218499	139562	0	6
1563218562	115609	0	226
1563218559	139562	0	6
1563218622	115609	0	226
1563218619	139562	0	6
1563218682	115609	0	226
1563218679	139562	0	6
1563218742	115609	0	225
1563218739	139562	0	6
1563218802	115609	14	224
1563218799	139562	0	6
1563218862	115609	1087	221
1563218859	139562	0	6
1563218922	115609	1087	221
1563218919	139562	0	6
1563218982	115609	1100	223
1563218979	139562	0	6
1563219043	115609	1104	223
1563219039	139562	0	6
1563219103	115609	1101	223
1563219163	115609	1110	224
1563219223	115609	1115	224
1563219283	115609	1114	224
1563219343	115609	1117	224
1563219403	115609	1119	224
1563219463	115609	1121	224
1563219523	115609	1115	224
1563219583	115609	1117	224
1563219643	115609	1120	224
1563219703	115609	1125	225
1563219763	115609	1117	224
1563219823	115609	1113	224
1563219883	115609	1119	224
1563219943	115609	1120	224
1563220003	115609	1124	225
1563220063	115609	1126	225
1563220123	115609	1131	225
1563220183	115609	1137	226
1563220243	115609	1136	226
1563220303	115609	1133	226
1563220363	115609	1127	225
1563220423	115609	1133	226
1563220483	115609	70	228
1563220543	115609	0	227
1563220603	115609	0	227
1563220663	115609	0	227
1563220723	115609	0	227
1563220783	115609	0	226
1563220843	115609	0	226
1563220903	115609	0	226
1563220963	115609	0	226
1563221023	115609	0	227
1563221083	115609	0	227
1563221143	115609	0	227
1563221203	115609	0	227
1563221264	115609	0	227
1563221324	115609	0	228
1563221384	115609	0	228
1563221444	115609	0	228
1563221504	115609	0	227
1563221564	115609	0	228
1563221624	115609	0	227
1563221684	115609	0	227
1563221744	115609	0	227
1563221804	115609	0	227
1563221864	115609	0	226
1563221924	115609	0	226
1563221984	115609	0	226
1563222044	115609	0	225
1563222104	115609	0	225
1563222164	115609	0	226
1563222224	115609	0	226
1563222284	115609	0	226
1563222344	115609	0	225
1563222404	115609	0	224
1563222464	115609	0	224
1563222524	115609	0	223
1563222584	115609	0	224
1563222644	115609	0	224
1563222704	115609	0	224
1563222764	115609	0	224
1563222824	115609	0	223
1563222884	115609	0	222
1563222944	115609	0	224
1563223004	115609	0	224
1563223064	115609	0	226
1563223124	115609	0	225
1563223184	115609	0	224
1563223244	115609	240	224
1563223304	115609	1089	222
1563223364	115609	1088	221
1563223424	115609	1075	220
1563223484	115609	1049	219
1563223544	115609	0	222
1563223604	115609	0	221
1563223664	115609	0	222
1563223724	115609	0	222
1563223784	115609	0	222
1563223844	115609	0	222
1563223904	115609	0	222
1563223964	115609	0	222
1563224024	115609	0	222
1563224084	115609	0	223
1563224144	115609	0	223
1563224204	115609	0	223
1563224264	115609	0	223
1563224324	115609	0	223
1563224384	115609	0	222
1563224444	115609	0	220
1563224504	115609	0	220
1563224564	115609	0	221
1563224624	115609	0	222
1563224684	115609	0	223
1563224744	115609	0	222
1563224804	115609	0	222
1563224865	115609	0	222
1563224925	115609	0	221
1563224985	115609	0	219
1563225045	115609	0	219
1563225105	115609	0	219
1563225165	115609	0	219
1563225225	115609	0	220
1563225285	115609	0	219
1563225345	115609	0	218
1563225405	115609	276	217
1563225465	115609	1038	216
1563225525	115609	1053	218
1563225585	115609	1058	218
1563225645	115609	1054	218
1563225705	115609	1041	217
1563225765	115609	944	214
1563225825	115609	0	216
1563225885	115609	0	217
1563225945	115609	0	217
1563226005	115609	0	219
1563226065	115609	0	221
1563226125	115609	0	220
1563226185	115609	0	220
1563226245	115609	0	220
1563226305	115609	0	219
1563226365	115609	0	219
1563226425	115609	0	219
1563226485	115609	0	219
1563226545	115609	0	220
1563226605	115609	0	221
1563226665	115609	0	221
1563226725	115609	0	221
1563226785	115609	0	220
1563226845	115609	0	219
1563226905	115609	0	219
1563226965	115609	0	219
1563227025	115609	0	219
1563227085	115609	0	218
1563227145	115609	0	218
1563227205	115609	0	219
1563227265	115609	0	220
1563227325	115609	0	221
1563227385	115609	0	222
1563227445	115609	0	222
1563227505	115609	0	221
1563227565	115609	0	220
1563227625	115609	0	221
1563227685	115609	0	221
1563227745	115609	0	221
1563227805	115609	0	222
1563227865	115609	0	221
1563227925	115609	0	221
1563227985	115609	0	221
1563228045	115609	0	221
1563228105	115609	0	221
1563228165	115609	0	221
1563228225	115609	0	220
1563228285	115609	0	219
1563228345	115609	0	219
1563228405	115609	0	218
1563228466	115609	0	218
1563228526	115609	0	218
1563228586	115609	0	219
1563228646	115609	0	217
1563228706	115609	0	218
1563228766	115609	0	217
1563228826	115609	0	216
1563228886	115609	0	214
1563228946	115609	0	214
1563229006	115609	0	216
1563229066	115609	0	217
1563229126	115609	0	217
1563229186	115609	0	217
1563229246	115609	0	217
1563229306	115609	0	217
1563229366	115609	0	217
1563229426	115609	0	217
1563229486	115609	0	217
1563229546	115609	0	218
1563229606	115609	793	217
1563229666	115609	1036	216
1563229726	115609	1038	216
1563229786	115609	1037	216
1563229846	115609	427	217
1563229906	115609	0	217
1563229966	115609	0	218
1563230026	115609	0	215
1563230086	115609	0	216
1563230146	115609	0	216
1563230206	115609	0	218
1563230266	115609	0	219
1563230326	115609	0	219
1563230386	115609	0	219
1563230446	115609	0	221
1563230506	115609	0	220
1563230566	115609	0	219
1563230626	115609	0	219
1563230686	115609	0	219
1563230746	115609	0	219
1563230806	115609	0	219
1563230869	115609	0	0
1563230929	115609	0	214
1563230989	115609	0	217
1563231049	115609	0	218
1563231109	115609	0	219
1563231169	115609	0	219
1563231229	115609	0	219
1563231289	115609	0	218
1563231349	115609	0	219
1563231409	115609	0	218
1563231479	115609	0	0
1563231539	115609	0	215
1563231599	115609	0	217
1563231659	115609	0	219
1563231719	115609	0	220
1563231779	115609	0	221
1563231840	115609	0	221
1563231900	115609	0	221
1563231960	115609	0	221
1563232020	115609	0	221
1563232080	115609	0	222
1563232140	115609	0	222
1563232200	115609	0	222
1563232260	115609	0	221
1563232320	115609	0	219
1563232380	115609	0	219
1563232440	115609	0	219
1563232500	115609	0	220
1563232560	115609	0	220
1563232620	115609	0	220
1563232680	115609	0	219
1563232740	115609	0	219
1563232800	115609	0	219
1563232860	115609	0	219
1563232920	115609	0	220
1563232980	115609	0	220
1563233040	115609	0	220
1563233100	115609	0	220
1563233160	115609	0	219
1563233220	115609	0	218
1563233280	115609	0	218
1563233340	115609	0	215
1563233400	115609	0	214
1563233460	115609	0	214
1563233520	115609	1012	214
1563233580	115609	1030	215
1563233640	115609	1026	215
1563233700	115609	1012	214
1563233760	115609	728	215
1563233820	115609	0	216
1563233890	115609	0	0
1563233950	115609	0	214
1563234010	115609	0	219
1563234070	115609	0	219
1563234130	115609	0	220
1563234190	115609	0	219
1563234250	115609	0	219
1563234310	115609	0	218
1563234370	115609	0	218
1563234430	115609	0	217
1563234490	115609	0	217
1563234550	115609	0	218
1563234610	115609	0	217
1563234670	115609	0	217
1563234730	115609	0	217
1563234790	115609	0	218
1563234850	115609	0	218
1563234910	115609	0	217
1563234970	115609	0	217
1563235030	115609	0	218
1563235090	115609	0	218
1563235150	115609	0	217
1563235210	115609	0	218
1563235270	115609	0	219
1563235330	115609	0	219
1563235390	115609	0	220
1563235450	115609	0	219
1563235510	115609	0	219
1563235570	115609	0	220
1563235630	115609	0	220
1563235690	115609	0	219
1563235750	115609	0	221
1563235810	115609	0	219
1563235870	115609	0	219
1563235930	115609	0	219
1563235990	115609	0	219
1563236050	115609	0	219
1563236110	115609	0	218
1563236170	115609	0	218
1563236230	115609	0	217
1563236290	115609	0	217
1563236350	115609	0	217
1563236410	115609	0	216
1563236470	115609	0	215
1563236530	115609	0	215
1563236590	115609	0	215
1563236650	115609	0	216
1563236710	115609	0	217
1563236770	115609	0	216
1563236830	115609	0	216
1563236890	115609	0	216
1563236950	115609	0	215
1563237010	115609	0	215
1563237070	115609	0	216
1563237130	115609	0	216
1563237190	115609	0	216
1563237250	115609	0	215
1563237310	115609	0	217
1563237370	115609	0	217
1563237430	115609	0	217
1563237491	115609	0	217
1563237551	115609	0	219
1563237611	115609	0	217
1563237671	115609	0	217
1563237731	115609	0	218
1563237791	115609	0	219
1563237851	115609	0	219
1563237911	115609	0	219
1563237971	115609	0	222
1563238031	115609	0	221
1563238091	115609	0	220
1563238151	115609	0	220
1563238211	115609	0	220
1563238271	115609	0	220
1563238331	115609	0	219
1563238391	115609	0	217
1563238451	115609	0	218
1563238511	115609	0	218
1563238571	115609	0	220
1563238631	115609	550	221
1563238691	115609	1070	219
1563238751	115609	1068	219
1563238811	115609	1060	219
1563238871	115609	1052	218
1563238931	115609	1043	217
1563238991	115609	465	219
1563239051	115609	0	219
1563239111	115609	0	220
1563239171	115609	0	220
1563239231	115609	0	220
1563239291	115609	0	220
1563239351	115609	0	220
1563239411	115609	0	218
1563239471	115609	0	218
1563239531	115609	0	217
1563239591	115609	0	217
1563239651	115609	0	218
1563239711	115609	0	219
1563239771	115609	0	220
1563239831	115609	0	219
1563239891	115609	0	219
1563239951	115609	0	218
1563240011	115609	0	220
1563240071	115609	0	220
1563240131	115609	0	220
1563240191	115609	0	219
1563240251	115609	0	218
1563240311	115609	0	219
1563240371	115609	0	218
1563240431	115609	0	217
1563240491	115609	0	215
1563240551	115609	0	215
1563240611	115609	0	215
1563240671	115609	0	217
1563240731	115609	0	219
1563240791	115609	0	219
1563240851	115609	0	218
1563240911	115609	0	218
1563240971	115609	0	218
1563241031	115609	0	219
1563241092	115609	0	219
1563241152	115609	0	220
1563241212	115609	0	221
1563241272	115609	0	222
1563241332	115609	0	223
1563241392	115609	0	222
1563241452	115609	0	222
1563241512	115609	0	219
1563241572	115609	0	217
1563241632	115609	0	217
1563241692	115609	0	216
1563241752	115609	0	216
1563241812	115609	0	216
1563241872	115609	0	217
1563241932	115609	0	217
1563241992	115609	0	218
1563242052	115609	476	219
1563242112	115609	1050	217
1563242172	115609	1044	217
1563242232	115609	1050	217
1563242292	115609	1043	217
1563242352	115609	1032	216
1563242412	115609	1042	217
1563242472	115609	1044	217
1563242532	115609	1045	217
1563242592	115609	714	218
1563242652	115609	0	220
1563242712	115609	0	219
1563242772	115609	0	219
1563242832	115609	0	222
1563242892	115609	0	222
1563242952	115609	0	223
1563243012	115609	0	223
1563243072	115609	0	222
1563243132	115609	0	222
1563243192	115609	0	222
1563243252	115609	0	222
1563243312	115609	0	221
1563243372	115609	0	221
1563243432	115609	0	221
1563243492	115609	0	222
1563243552	115609	0	223
1563243612	115609	0	222
1563243672	115609	0	222
1563243732	115609	0	222
1563243792	115609	0	221
1563243852	115609	0	220
1563243912	115609	0	220
1563243972	115609	0	219
1563244032	115609	0	219
1563244092	115609	0	218
1563244152	115609	0	217
1563244212	115609	0	218
1563244272	115609	0	219
1563244332	115609	0	219
1563244392	115609	0	220
1563244452	115609	0	221
1563244512	115609	0	220
1563244572	115609	0	221
1563244632	115609	0	221
1563244693	115609	0	222
1563244753	115609	0	223
1563244813	115609	0	223
1563244873	115609	0	222
1563244933	115609	0	222
1563244993	115609	0	222
1563245053	115609	0	224
1563245113	115609	0	224
1563245173	115609	0	224
1563245233	115609	0	222
1563245293	115609	294	221
1563245353	115609	1069	219
1563245413	115609	1078	220
1563245473	115609	1081	221
1563245533	115609	531	224
1563245593	115609	0	224
1563245653	115609	0	224
1563245713	115609	0	224
1563245773	115609	0	224
1563245833	115609	0	225
1563245893	115609	727	224
1563245953	115609	1100	223
1563246013	115609	1099	222
1563246073	115609	1089	222
1563246133	115609	1089	222
1563246193	115609	312	221
1563246253	115609	44	222
1563246313	115609	1070	219
1563246373	115609	1069	219
1563246433	115609	1079	220
1563246504	115609	0	0
1563246564	115609	1068	218
1563246624	115609	1078	220
1563246684	115609	1061	219
1563246744	115609	1065	219
1563246804	115609	1071	219
1563246864	115609	1077	220
1563246924	115609	1077	220
1563246984	115609	1075	220
1563247044	115609	1084	221
1563247104	115609	1074	220
1563247164	115609	1077	220
1563247224	115609	1079	220
1563247284	115609	1077	220
1563247344	115609	1075	220
1563247404	115609	1086	221
1563247464	115609	1076	220
1563247524	115609	1069	219
1563247584	115609	1071	219
1563247644	115609	1074	220
1563247704	115609	1081	220
1563247764	115609	1089	221
1563247824	115609	1095	222
1563247884	115609	1103	223
1563247944	115609	1094	222
1563248004	115609	1098	222
1563248064	115609	1090	222
1563248124	115609	1095	222
1563248184	115609	1098	222
1563248244	115609	1101	222
1563248304	115609	1099	222
1563248364	115609	1101	222
1563248424	115609	1094	222
1563248484	115609	1093	222
1563248544	115609	1097	222
1563248604	115609	1098	222
1563248664	115609	1098	222
1563248724	115609	1097	222
1563248784	115609	1092	222
1563248844	115609	1093	222
1563248904	115609	1095	222
1563248964	115609	1100	222
1563249024	115609	1098	222
1563249084	115609	1107	223
1563249144	115609	1106	223
1563249204	115609	1110	223
1563249264	115609	1102	222
1563249324	115609	1105	223
1563249384	115609	1105	223
1563249444	115609	1117	224
1563249504	115609	1116	224
1563249564	115609	1125	225
1563249624	115609	1129	225
1563249684	115609	1123	224
1563249744	115609	1116	224
1563249804	115609	1112	224
1563249864	115609	1110	223
1563249924	115609	1118	224
1563249984	115609	1117	224
1563250044	115609	1118	224
1563250105	115609	1110	223
1563250165	115609	1106	223
1563250225	115609	1095	222
1563250285	115609	1080	220
1563250345	115609	1093	222
1563250405	115609	1090	222
1563250465	115609	1081	220
1563250525	115609	1077	220
1563250585	115609	1071	219
1563250645	115609	1084	221
1563250705	115609	1100	222
1563250765	115609	1108	223
1563250825	115609	1110	223
1563250885	115609	1102	222
1563250945	115609	1097	222
1563251005	115609	651	223
1563251065	115609	0	225
1563251125	115609	0	227
1563251185	115609	0	227
1563251245	115609	0	227
1563251305	115609	0	226
1563251365	115609	0	226
1563251426	115609	0	226
1563251486	115609	0	227
1563251546	115609	0	226
1563251606	115609	0	226
1563251666	115609	0	225
1563251726	115609	0	225
1563251786	115609	0	225
1563251846	115609	142	225
1563251906	115609	1100	222
1563251966	115609	1090	222
1563252026	115609	1081	221
1563252086	115609	1089	222
1563252146	115609	929	222
1563252206	115609	0	224
1563252266	115609	0	224
1563252326	115609	0	225
1563252386	115609	0	225
1563252446	115609	0	226
1563252506	115609	0	226
1563252566	115609	0	227
1563252626	115609	0	226
1563252686	115609	0	225
1563252746	115609	0	225
1563252806	115609	0	224
1563252866	115609	0	225
1563252926	115609	0	225
1563252986	115609	0	225
1563253046	115609	0	225
1563253106	115609	0	226
1563253166	115609	0	226
1563253226	115609	0	225
1563253286	115609	0	226
1563253346	115609	0	225
1563253406	115609	0	225
1563253466	115609	0	225
1563253526	115609	0	226
1563253586	115609	0	227
1563253646	115609	0	227
1563253707	115609	0	226
1563253767	115609	0	224
1563253827	115609	0	224
1563253887	115609	0	224
1563253947	115609	0	225
1563254007	115609	0	226
1563254067	115609	0	226
1563254127	115609	0	225
1563254187	115609	0	226
1563254247	115609	0	226
1563254307	115609	0	227
1563254367	115609	0	226
1563254427	115609	0	226
1563254487	115609	0	226
1563254547	115609	0	224
1563254607	115609	0	225
1563254667	115609	0	225
1563254727	115609	0	227
1563254787	115609	0	229
1563254847	115609	0	227
1563254907	115609	0	227
1563254967	115609	0	226
1563255027	115609	0	226
1563255087	115609	0	225
1563255147	115609	0	226
1563255207	115609	0	226
1563255267	115609	0	227
1563255327	115609	0	228
1563255387	115609	0	228
1563255447	115609	0	228
1563255507	115609	850	224
1563255567	115609	1108	224
1563255627	115609	1109	224
1563255687	115609	726	225
1563255747	115609	0	227
1563255807	115609	0	227
1563255867	115609	0	226
1563255927	115609	0	226
1563255987	115609	0	227
1563256047	115609	0	227
1563256107	115609	0	228
1563256167	115609	0	227
1563256227	115609	0	227
1563256287	115609	0	226
1563256347	115609	0	226
1563256407	115609	0	227
1563256467	115609	0	229
1563256527	115609	0	229
1563256587	115609	0	228
1563256647	115609	0	227
1563256718	115609	0	0
1563256778	115609	0	224
1563256838	115609	0	227
1563256898	115609	0	227
1563256958	115609	0	227
1563257018	115609	0	227
1563257078	115609	0	228
1563257138	115609	0	227
1563257198	115609	0	227
1563257258	115609	0	228
1563257318	115609	0	228
1563257378	115609	0	227
1563257438	115609	0	228
1563257498	115609	0	228
1563257558	115609	0	228
1563257618	115609	0	229
1563257678	115609	0	229
1563257738	115609	0	228
1563257798	115609	0	228
1563257858	115609	0	227
1563257918	115609	0	228
1563257978	115609	0	229
1563258038	115609	0	228
1563258098	115609	0	227
1563258158	115609	0	227
1563258218	115609	0	226
1563258278	115609	0	227
1563258338	115609	0	226
1563258398	115609	0	225
1563258458	115609	0	225
1563258524	115609	0	0
1563258584	115609	0	223
1563258644	115609	0	226
1563258704	115609	0	225
1563258764	115609	0	225
1563258824	115609	0	225
1563258884	115609	0	226
1563258944	115609	0	227
1563259004	115609	0	227
1563259064	115609	0	227
1563259124	115609	0	228
1563259184	115609	0	228
1563259244	115609	0	228
1563259304	115609	0	227
1563259364	115609	0	228
1563259424	115609	0	227
1563259484	115609	0	224
1563259544	115609	0	223
1563259604	115609	0	224
1563259664	115609	0	226
1563259724	115609	0	227
1563259784	115609	0	227
1563259844	115609	0	227
1563259904	115609	0	226
1563259964	115609	0	227
1563260024	115609	0	227
1563260084	115609	0	229
1563260144	115609	0	228
1563260204	115609	0	227
1563260264	115609	0	225
1563260324	115609	0	224
1563260384	115609	0	224
1563260444	115609	0	225
1563260504	115609	0	226
1563260564	115609	81	227
1563260624	115609	1131	226
1563260684	115609	1138	227
1563260744	115609	1133	226
1563260804	115609	595	226
1563260864	115609	0	227
1563260924	115609	0	226
1563260984	115609	0	226
1563261044	115609	0	226
1563261104	115609	0	226
1563261164	115609	0	226
1563261224	115609	0	227
1563261284	115609	0	229
1563261344	115609	0	228
1563261404	115609	0	228
1563261464	115609	0	227
1563261524	115609	0	226
1563261584	115609	0	225
1563261644	115609	0	224
1563261704	115609	0	224
1563261764	115609	0	226
1563261824	115609	0	227
1563261884	115609	0	228
1563261944	115609	0	227
1563262004	115609	0	227
1563262064	115609	0	227
1563262125	115609	0	227
1563262185	115609	0	227
1563262245	115609	0	227
1563262305	115609	0	227
1563262365	115609	0	227
1563262425	115609	0	227
1563262485	115609	0	226
1563262545	115609	0	226
1563262605	115609	0	227
1563262665	115609	0	227
1563262725	115609	0	227
1563262785	115609	0	227
1563262845	115609	0	226
1563262905	115609	0	228
1563262965	115609	0	229
1563263025	115609	0	228
1563263085	115609	0	226
1563263145	115609	0	225
1563263205	115609	0	225
1563263265	115609	0	225
1563263325	115609	0	224
1563263385	115609	0	225
1563263445	115609	0	227
1563263505	115609	0	228
1563263565	115609	0	228
1563263625	115609	0	227
1563263685	115609	0	227
1563263745	115609	0	226
1563263805	115609	0	225
1563263865	115609	0	226
1563263925	115609	0	225
1563263985	115609	0	226
1563264045	115609	0	227
1563264105	115609	0	226
1563264165	115609	0	226
1563264225	115609	0	225
1563264285	115609	0	225
1563264345	115609	0	225
1563264405	115609	0	226
1563264465	115609	0	225
1563264525	115609	0	225
1563264585	115609	0	226
1563264645	115609	0	227
1563264705	115609	0	229
1563264765	115609	0	228
1563264825	115609	0	229
1563264885	115609	0	227
1563264945	115609	0	227
1563265005	115609	0	226
1563265065	115609	0	226
1563265125	115609	0	227
1563265185	115609	0	227
1563265245	115609	0	227
1563265305	115609	0	226
1563265365	115609	0	226
1563265425	115609	0	226
1563265485	115609	0	228
1563265545	115609	0	228
1563265605	115609	0	227
1563265665	115609	0	227
1563265726	115609	0	227
1563265786	115609	0	227
1563265846	115609	427	227
1563265906	115609	1123	225
1563265966	115609	1118	224
1563266026	115609	1117	224
1563266086	115609	226	226
1563266146	115609	0	227
1563266206	115609	0	229
1563266266	115609	0	230
1563266326	115609	0	229
1563266386	115609	0	227
1563266446	115609	0	226
1563266506	115609	0	226
1563266566	115609	0	226
1563266626	115609	0	226
1563266686	115609	0	227
1563266746	115609	0	225
1563266806	115609	0	226
1563266866	115609	0	228
1563266926	115609	0	228
1563266986	115609	0	228
1563267046	115609	0	227
1563267106	115609	0	227
1563267166	115609	0	227
1563267226	115609	0	227
1563267286	115609	0	227
1563267346	115609	0	227
1563267406	115609	0	226
1563267466	115609	0	226
1563267526	115609	0	226
1563267586	115609	0	227
1563267646	115609	0	229
1563267706	115609	0	228
1563267766	115609	0	227
1563267826	115609	0	226
1563267886	115609	0	227
1563267946	115609	0	228
1563268006	115609	0	228
1563268066	115609	0	227
1563268126	115609	0	225
1563268186	115609	0	225
1563268246	115609	0	226
1563268306	115609	0	228
1563268366	115609	0	228
1563268426	115609	0	228
1563268486	115609	0	228
1563268546	115609	0	227
1563268606	115609	0	226
1563268666	115609	0	225
1563268726	115609	0	224
1563268786	115609	0	225
1563268846	115609	0	225
1563268906	115609	0	226
1563268966	115609	0	227
1563269026	115609	0	227
1563269086	115609	0	227
1563269146	115609	0	227
1563269206	115609	0	226
1563269266	115609	0	226
1563269327	115609	0	225
1563269387	115609	0	225
1563269447	115609	0	224
1563269507	115609	0	223
1563269567	115609	0	224
1563269627	115609	0	225
1563269687	115609	0	225
1563269747	115609	0	225
1563269807	115609	0	224
1563269867	115609	0	224
1563269927	115609	0	224
1563269987	115609	0	223
1563270047	115609	0	223
1563270107	115609	0	224
1563270167	115609	0	224
1563270227	115609	0	223
1563270287	115609	0	222
1563270347	115609	0	222
1563270407	115609	0	223
1563270467	115609	0	224
1563270527	115609	0	222
1563270587	115609	0	222
1563270647	115609	0	222
1563270707	115609	0	222
1563270767	115609	0	222
1563270827	115609	0	223
1563270887	115609	0	222
1563270947	115609	407	220
1563271007	115609	1060	219
1563271067	115609	1065	219
1563271127	115609	1073	220
1563271187	115609	361	221
1563271247	115609	0	222
1563271307	115609	0	220
1563271367	115609	0	220
1563271427	115609	0	221
1563271487	115609	0	221
1563271547	115609	0	221
1563271607	115609	0	220
1563271667	115609	0	220
1563271727	115609	0	221
1563271787	115609	0	221
1563271847	115609	0	221
1563271907	115609	0	222
1563271967	115609	0	222
1563272027	115609	0	219
1563272087	115609	0	220
1563272147	115609	0	219
1563272207	115609	0	219
1563272267	115609	0	220
1563272327	115609	0	220
1563272387	115609	0	220
1563272447	115609	0	221
1563272507	115609	0	222
1563272567	115609	0	223
1563272627	115609	0	222
1563272687	115609	0	219
1563272747	115609	0	218
1563272807	115609	0	217
1563272867	115609	0	218
1563272928	115609	0	219
1563272988	115609	0	219
1563273048	115609	0	220
1563273108	115609	0	222
1563273168	115609	0	220
1563273228	115609	0	219
1563273288	115609	0	218
1563273348	115609	0	217
1563273408	115609	0	219
1563273468	115609	0	219
1563273528	115609	0	218
1563273588	115609	0	219
1563273648	115609	0	220
1563273708	115609	0	221
1563273768	115609	0	220
1563273828	115609	0	220
1563273888	115609	0	221
1563273948	115609	0	220
1563274008	115609	0	219
1563274068	115609	0	218
1563274128	115609	0	218
1563274188	115609	0	219
1563274249	115609	0	218
1563274309	115609	0	218
1563274369	115609	0	218
1563274429	115609	0	218
1563274489	115609	0	219
1563274549	115609	0	220
1563274609	115609	0	220
1563274669	115609	0	219
1563274729	115609	0	219
1563274789	115609	0	219
1563274849	115609	0	219
1563274909	115609	0	219
1563274969	115609	0	217
1563275029	115609	0	217
1563275089	115609	0	218
1563275149	115609	108	217
1563275209	115609	1036	216
1563275269	115609	1040	217
1563275329	115609	1026	215
1563275389	115609	1022	214
1563275449	115609	1046	217
1563275509	115609	1031	215
1563275569	115609	1027	215
1563275629	115609	1033	216
1563275689	115609	1036	216
1563275749	115609	1033	216
1563275809	115609	1033	216
1563275869	115609	1036	216
1563275929	115609	1030	215
1563275989	115609	1028	215
1563276049	115609	1028	215
1563276109	115609	1036	216
1563276169	115609	1034	216
1563276229	115609	1029	215
1563276289	115609	1027	215
1563276349	115609	1030	215
1563276409	115609	1037	216
1563276469	115609	1046	217
1563276530	115609	1044	217
1563276590	115609	1044	217
1563276650	115609	413	217
1563276710	115609	322	217
1563276770	115609	1021	214
1563276830	115609	1027	215
1563276890	115609	1022	214
1563276950	115609	1024	215
1563277010	115609	1032	216
1563277070	115609	1027	215
1563277130	115609	1027	215
1563277190	115609	1018	214
1563277250	115609	1002	212
1563277310	115609	1014	214
1563277370	115609	1012	214
1563277430	115609	1015	214
1563277490	115609	1017	214
1563277550	115609	1028	215
1563277610	115609	1040	216
1563277670	115609	1057	218
1563277730	115609	1027	215
1563277790	115609	1025	215
1563277850	115609	1022	214
1563277910	115609	1031	215
1563277970	115609	1049	217
1563278030	115609	1046	217
1563278090	115609	1040	216
1563278150	115609	1040	216
1563278210	115609	1045	217
1563278270	115609	1035	216
1563278338	115609	0	0
1563278398	115609	1032	214
1563278458	115609	1054	218
1563278518	115609	1049	217
1563278578	115609	1042	217
1563278638	115609	1042	217
1563278698	115609	1051	217
1563278758	115609	1081	220
1563278818	115609	1075	220
1563278878	115609	1088	221
1563278950	115609	0	0
1563279010	115609	1090	220
1563279070	115609	1095	222
1563279130	115609	1089	221
1563279190	115609	1098	222
1563279250	115609	1118	224
1563279310	115609	1120	224
1563279370	115609	1110	223
1563279430	115609	1098	222
1563279490	115609	1095	222
1563279550	115609	1096	222
1563279610	115609	1093	222
1563279670	115609	1088	221
1563279730	115609	1095	222
1563279790	115609	1101	222
1563279850	115609	1093	222
1563279910	115609	1079	220
1563279970	115609	1081	220
1563280030	115609	1080	220
1563280090	115609	1093	222
1563280150	115609	1097	222
1563280210	115609	1096	222
1563280270	115609	1090	222
1563280330	115609	1086	221
1563280390	115609	1090	221
1563280450	115609	1109	223
1563280510	115609	1118	224
1563280570	115609	1120	224
1563280630	115609	1108	223
1563280690	115609	1105	223
1563280750	115609	1105	223
1563280810	115609	1108	223
1563280870	115609	1125	225
1563280930	115609	1126	225
1563280990	115609	1120	224
1563281050	115609	1113	224
1563281110	115609	1108	223
1563281170	115609	1115	224
1563281230	115609	1009	224
1563281290	115609	0	226
1563281350	115609	0	225
1563281410	115609	0	225
1563281470	115609	0	225
1563281530	115609	0	225
1563281590	115609	0	225
1563281650	115609	0	225
1563281710	115609	0	225
1563281770	115609	0	225
1563281830	115609	0	223
1563281890	115609	0	225
1563281950	115609	0	226
1563282010	115609	0	227
1563282070	115609	0	227
1563282130	115609	0	226
1563282190	115609	0	227
1563282250	115609	0	227
1563282310	115609	416	225
1563282370	115609	1105	223
1563282430	115609	1103	223
1563282490	115609	1105	223
1563282551	115609	280	226
1563282611	115609	0	225
1563282671	115609	0	224
1563282731	115609	0	224
1563282791	115609	0	224
1563282851	115609	0	224
1563282911	115609	0	226
1563282971	115609	0	226
1563283031	115609	0	225
1563283091	115609	0	225
1563283151	115609	0	226
1563283211	115609	0	226
1563283271	115609	0	226
1563283331	115609	0	226
1563283391	115609	0	225
1563283451	115609	0	225
1563283511	115609	0	226
1563283571	115609	0	226
1563283631	115609	0	225
1563283691	115609	0	225
1563283751	115609	0	226
1563283811	115609	0	226
1563283871	115609	0	226
1563283931	115609	0	225
1563283991	115609	0	226
1563284051	115609	0	227
1563284111	115609	0	227
1563284171	115609	0	227
1563284231	115609	0	227
1563284291	115609	0	227
1563284351	115609	0	227
1563284411	115609	0	227
1563284471	115609	0	227
1563284531	115609	0	227
1563284591	115609	0	225
1563284651	115609	0	225
1563284711	115609	0	225
1563284771	115609	0	225
1563284831	115609	0	225
1563284891	115609	0	225
1563284951	115609	0	226
1563285011	115609	0	226
1563285071	115609	0	226
1563285131	115609	0	226
1563285191	115609	0	225
1563285251	115609	610	224
1563285311	115609	1100	223
1563285371	115609	1107	223
1563285431	115609	858	224
1563285491	115609	0	226
1563285551	115609	0	226
1563285611	115609	0	225
1563285671	115609	0	226
1563285731	115609	0	225
1563285791	115609	0	225
1563285851	115609	0	225
1563285911	115609	0	225
1563285971	115609	0	226
1563286031	115609	0	225
1563286091	115609	0	226
1563286217	115609	0	0
1563286277	115609	0	225
1563286337	115609	0	227
1563286397	115609	0	226
1563286457	115609	0	225
1563286517	115609	0	226
1563286577	115609	0	225
1563286637	115609	0	226
1563286697	115609	0	226
1563286757	115609	0	224
1563286828	115609	0	0
1563286888	115609	0	222
1563286948	115609	0	225
1563287008	115609	0	225
1563287068	115609	0	224
1563287128	115609	987	222
1563287188	115609	1097	222
1563287248	115609	1095	222
1563287308	115609	1080	221
1563287368	115609	0	224
1563287428	115609	0	225
1563287488	115609	0	225
1563287548	115609	0	226
1563287608	115609	0	226
1563287668	115609	0	224
1563287728	115609	0	224
1563287788	115609	0	223
1563287848	115609	0	224
1563287908	115609	0	224
1563287968	115609	0	225
1563288028	115609	0	226
1563288088	115609	0	226
1563288148	115609	0	226
1563288208	115609	0	226
1563288268	115609	0	227
1563288328	115609	0	227
1563288388	115609	0	226
1563288448	115609	0	226
1563288508	115609	0	225
1563288568	115609	0	224
1563288628	115609	0	224
1563288688	115609	0	223
1563288748	115609	0	222
1563288808	115609	0	222
1563288868	115609	0	222
1563288928	115609	0	224
1563288988	115609	0	224
1563289048	115609	0	224
1563289108	115609	0	223
1563289168	115609	0	223
1563289228	115609	0	223
1563289288	115609	0	223
1563289348	115609	0	223
1563289408	115609	0	224
1563289468	115609	0	225
1563289528	115609	0	227
1563289588	115609	0	226
1563289648	115609	0	227
1563289708	115609	0	227
1563289768	115609	0	227
1563289828	115609	0	226
1563289888	115609	0	226
1563289948	115609	0	226
1563290008	115609	0	227
1563290068	115609	0	227
1563290128	115609	0	226
1563290188	115609	0	226
1563290248	115609	0	226
1563290308	115609	0	226
1563290368	115609	0	226
1563290429	115609	0	225
1563290489	115609	0	226
1563290549	115609	0	225
1563290609	115609	0	226
1563290669	115609	0	227
1563290729	115609	0	227
1563290789	115609	0	227
1563290849	115609	0	228
1563290909	115609	0	228
1563290969	115609	0	228
1563291029	115609	0	227
1563291089	115609	0	227
1563291149	115609	0	227
1563291209	115609	0	227
1563291269	115609	0	228
1563291329	115609	0	228
1563291389	115609	0	226
1563291449	115609	0	226
1563291509	115609	0	225
1563291569	115609	0	226
1563291629	115609	0	226
1563291689	115609	0	225
1563291749	115609	890	222
1563291809	115609	1097	222
1563291869	115609	1109	224
1563291929	115609	1117	224
1563291989	115609	1	227
1563292049	115609	0	228
1563292109	115609	0	227
1563292169	115609	0	227
1563292229	115609	0	226
1563292289	115609	0	225
1563292349	115609	0	225
1563292409	115609	0	226
1563292469	115609	0	226
1563292529	115609	0	227
1563292589	115609	0	227
1563292649	115609	0	227
1563292709	115609	0	227
1563292769	115609	0	227
1563292829	115609	0	228
1563292889	115609	0	228
1563292949	115609	0	227
1563293009	115609	24	227
1563293069	115609	1117	224
1563293129	115609	1117	224
1563293189	115609	1123	225
1563293249	115609	1128	225
1563293309	115609	1125	225
1563293369	115609	623	227
1563293429	115609	0	227
1563293489	115609	0	227
1563293549	115609	0	227
1563293609	115609	0	228
1563293669	115609	0	228
1563293729	115609	0	227
1563293789	115609	0	227
1563293849	115609	0	227
1563293909	115609	0	226
1563293969	115609	0	227
1563294030	115609	0	227
1563294090	115609	0	226
1563294150	115609	0	226
1563294210	115609	0	226
1563294270	115609	0	227
1563294330	115609	0	228
1563294390	115609	0	229
1563294450	115609	0	228
1563294510	115609	0	228
1563294570	115609	0	228
1563294641	115609	0	0
1563294701	115609	0	224
1563294761	115609	0	227
1563294821	115609	0	229
1563294881	115609	0	228
1563294941	115609	0	229
1563295001	115609	0	227
1563295061	115609	0	228
1563295121	115609	0	227
1563295181	115609	0	227
1563295241	115609	0	227
1563295301	115609	0	229
1563295361	115609	0	227
1563295421	115609	0	226
1563295481	115609	0	227
1563295541	115609	0	227
1563295601	115609	0	227
1563295661	115609	0	228
1563295721	115609	0	227
1563295781	115609	0	228
1563295841	115609	0	227
1563295901	115609	0	227
1563295961	115609	0	227
1563296021	115609	0	226
1563296081	115609	0	226
1563296141	115609	0	226
1563296201	115609	0	226
1563296261	115609	0	226
1563296321	115609	0	226
1563296381	115609	0	227
1563296441	115609	0	227
1563296501	115609	0	227
1563296561	115609	0	227
1563296621	115609	0	226
1563296681	115609	0	226
1563296741	115609	0	227
1563296801	115609	0	228
1563296861	115609	0	227
1563296921	115609	0	226
1563296981	115609	0	224
1563297041	115609	0	224
1563297101	115609	753	222
1563297161	115609	1096	222
1563297221	115609	1101	223
1563297281	115609	660	224
1563297341	115609	0	227
1563297401	115609	0	226
1563297461	115609	0	226
1563297521	115609	0	227
1563297581	115609	0	226
1563297641	115609	0	225
1563297701	115609	0	225
1563297761	115609	0	226
1563297821	115609	0	225
1563297881	115609	0	225
1563297941	115609	0	227
1563298001	115609	0	227
1563298061	115609	0	227
1563298121	115609	0	228
1563298181	115609	0	228
1563298243	115609	0	227
1563298303	115609	0	226
1563298363	115609	0	227
1563298423	115609	0	227
1563298483	115609	0	227
1563298543	115609	0	227
1563298603	115609	0	224
1563298663	115609	0	223
1563298723	115609	0	223
1563298783	115609	0	224
1563298843	115609	0	225
1563298903	115609	0	226
1563298963	115609	0	225
1563299023	115609	0	225
1563299083	115609	0	225
1563299143	115609	0	225
1563299203	115609	0	225
1563299263	115609	0	225
1563299323	115609	0	226
1563299383	115609	0	226
1563299443	115609	0	225
1563299503	115609	0	224
1563299563	115609	0	225
1563299623	115609	0	225
1563299683	115609	0	225
1563299743	115609	0	225
1563299803	115609	0	224
1563299863	115609	0	223
1563299923	115609	0	223
1563299983	115609	0	223
1563300053	115609	0	0
1563300113	115609	0	221
1563300173	115609	0	224
1563300233	115609	0	224
1563300293	115609	0	224
1563300353	115609	0	225
1563300413	115609	0	227
1563300473	115609	0	227
1563300533	115609	0	227
1563300593	115609	0	226
1563300653	115609	0	227
1563300713	115609	0	227
1563300773	115609	0	228
1563300833	115609	0	228
1563300893	115609	0	228
1563300953	115609	0	228
1563301013	115609	0	229
1563301073	115609	0	229
1563301133	115609	0	229
1563301193	115609	0	229
1563301253	115609	0	229
1563301313	115609	0	228
1563301373	115609	0	227
1563301433	115609	0	228
1563301493	115609	0	228
1563301553	115609	0	229
1563301613	115609	0	229
1563301673	115609	0	228
1563301733	115609	0	228
1563301793	115609	0	229
1563301965	115609	0	0
1563302025	115609	0	226
1563302085	115609	0	229
1563302145	115609	0	228
1563302205	115609	0	227
1563302265	115609	0	227
1563302325	115609	0	227
1563302385	115609	0	227
1563302445	115609	0	228
1563302505	115609	0	228
1563302565	115609	0	227
1563302625	115609	0	227
1563302685	115609	0	227
1563302745	115609	0	227
1563302805	115609	0	228
1563302865	115609	855	226
1563302925	115609	1122	225
1563302985	115609	1113	224
1563303045	115609	832	225
1563303105	115609	0	227
1563303165	115609	0	228
1563303225	115609	0	228
1563303285	115609	0	228
1563303345	115609	0	227
1563303405	115609	0	227
1563303465	115609	0	228
1563303525	115609	0	228
1563303585	115609	0	228
1563303645	115609	0	228
1563303705	115609	0	227
1563303765	115609	0	227
1563303825	115609	0	226
1563303885	115609	0	226
1563303945	115609	0	227
1563304005	115609	0	227
1563304065	115609	0	227
1563304125	115609	0	228
1563304185	115609	0	227
1563304245	115609	0	228
1563304305	115609	0	228
1563304365	115609	0	229
1563304425	115609	0	229
1563304485	115609	0	229
1563304545	115609	0	229
1563304605	115609	0	229
1563304665	115609	0	229
1563304725	115609	0	229
1563304785	115609	0	229
1563304845	115609	0	229
1563304905	115609	0	229
1563304965	115609	0	228
1563305025	115609	0	227
1563305085	115609	0	228
1563305145	115609	0	229
1563305205	115609	0	229
1563305265	115609	0	229
1563305325	115609	0	230
1563305385	115609	0	230
1563305445	115609	0	230
1563305505	115609	0	230
1563305566	115609	0	231
1563305626	115609	0	231
1563305686	115609	0	230
1563305746	115609	0	229
1563305806	115609	0	230
1563305866	115609	0	229
1563305926	115609	0	229
1563305986	115609	0	230
1563306046	115609	0	230
1563306106	115609	0	229
1563306166	115609	0	228
1563306226	115609	0	227
1563306286	115609	0	228
1563306346	115609	0	229
1563306406	115609	0	229
1563306466	115609	0	229
1563306526	115609	0	229
1563306586	115609	0	230
1563306646	115609	0	230
1563306706	115609	0	230
1563306766	115609	0	230
1563306826	115609	0	229
1563306886	115609	0	229
1563306946	115609	0	228
1563307006	115609	0	227
1563307066	115609	0	228
1563307126	115609	0	228
1563307186	115609	0	228
1563307246	115609	0	228
1563307306	115609	0	228
1563307366	115609	0	228
1563307426	115609	0	229
1563307486	115609	0	229
1563307546	115609	0	229
1563307606	115609	0	229
1563307666	115609	0	227
1563307726	115609	0	227
1563307786	115609	0	227
1563307846	115609	0	229
1563307906	115609	0	228
1563307966	115609	0	228
1563308026	115609	0	227
1563308086	115609	0	227
1563308146	115609	0	227
1563308206	115609	0	228
1563308266	115609	0	228
1563308326	115609	0	227
1563308386	115609	797	226
1563308446	115609	1135	226
1563308506	115609	1136	226
1563308566	115609	1024	227
1563308626	115609	0	229
1563308686	115609	0	229
1563308746	115609	0	229
1563308806	115609	0	228
1563308866	115609	0	228
1563308926	115609	0	228
1563308986	115609	0	227
1563309046	115609	0	227
1563309106	115609	0	227
1563309167	115609	0	227
1563309227	115609	0	227
1563309287	115609	0	227
1563309347	115609	942	225
1563309407	115609	1118	224
1563309467	115609	1104	223
1563309527	115609	1096	222
1563309588	115609	1096	222
1563309648	115609	1096	222
1563309708	115609	884	223
1563309768	115609	0	225
1563309828	115609	0	225
1563309888	115609	0	224
1563309948	115609	0	224
1563310008	115609	0	224
1563310068	115609	0	224
1563310128	115609	0	224
1563310188	115609	0	225
1563310248	115609	0	225
1563310308	115609	0	223
1563310368	115609	0	222
1563310428	115609	0	223
1563310488	115609	0	224
1563310548	115609	0	223
1563310608	115609	0	223
1563310668	115609	0	223
1563310728	115609	0	223
1563310788	115609	0	224
1563310848	115609	0	224
1563310908	115609	0	224
1563310968	115609	0	225
1563311028	115609	0	224
1563311088	115609	0	222
1563311148	115609	0	222
1563311208	115609	0	222
1563311268	115609	0	222
1563311328	115609	0	222
1563311388	115609	0	222
1563311448	115609	0	221
1563311508	115609	0	219
1563311568	115609	0	220
1563311628	115609	0	221
1563311688	115609	0	221
1563311748	115609	0	221
1563311808	115609	0	220
1563311868	115609	0	219
1563311928	115609	0	219
1563311988	115609	0	219
1563312048	115609	0	220
1563312108	115609	0	221
1563312168	115609	0	219
1563312228	115609	0	218
1563312288	115609	0	218
1563312348	115609	0	219
1563312408	115609	0	219
1563312468	115609	0	218
1563312528	115609	0	217
1563312588	115609	0	217
1563312648	115609	0	217
1563312708	115609	0	218
1563312776	115609	0	0
1563312836	115609	0	214
1563312896	115609	0	217
1563312956	115609	0	217
1563313016	115609	0	217
1563313076	115609	0	218
1563313136	115609	0	218
1563313196	115609	0	217
1563313256	115609	0	216
1563313316	115609	0	217
1563313376	115609	0	217
1563313436	115609	0	219
1563313496	115609	0	220
1563313556	115609	0	220
1563313616	115609	0	219
1563313676	115609	0	219
1563313736	115609	0	220
1563313796	115609	0	221
1563313856	115609	0	221
1563313916	115609	0	220
1563313976	115609	0	218
1563314036	115609	0	218
1563314096	115609	0	218
1563314156	115609	863	217
1563314216	115609	1048	217
1563314276	115609	1053	218
1563314336	115609	814	217
1563314396	115609	0	218
1563314456	115609	0	218
1563314516	115609	0	218
1563314576	115609	0	217
1563314636	115609	0	217
1563314696	115609	0	217
1563314756	115609	0	217
1563314816	115609	0	218
1563314876	115609	0	219
1563314936	115609	0	219
1563314996	115609	332	218
1563315056	115609	1035	216
1563315116	115609	1038	216
1563315176	115609	1040	217
1563315236	115609	784	217
1563315296	115609	0	219
1563315356	115609	0	220
1563315416	115609	0	220
1563315476	115609	0	221
1563315536	115609	0	221
1563315596	115609	0	221
1563315656	115609	0	221
1563315716	115609	0	220
1563315776	115609	0	219
1563315836	115609	0	219
1563315896	115609	0	220
1563315956	115609	0	221
1563316016	115609	0	221
1563316076	115609	0	221
1563316136	115609	0	219
1563316196	115609	0	219
1563316256	115609	0	219
1563316316	115609	0	219
1563316377	115609	0	219
1563316437	115609	0	219
1563316497	115609	0	220
1563316557	115609	0	220
1563316617	115609	0	220
1563316677	115609	0	222
1563316737	115609	0	222
1563316797	115609	0	221
1563316857	115609	0	221
1563316917	115609	0	221
1563316977	115609	0	222
1563317037	115609	0	223
1563317097	115609	0	222
1563317157	115609	0	221
1563317217	115609	0	221
1563317277	115609	0	221
1563317337	115609	0	221
1563317397	115609	0	222
1563317457	115609	0	222
1563317517	115609	0	222
1563317577	115609	0	221
1563317637	115609	0	221
1563317697	115609	0	221
1563317757	115609	0	220
1563317817	115609	359	219
1563317877	115609	1045	217
1563317937	115609	1031	216
1563317997	115609	1029	215
1563318057	115609	25	219
1563318117	115609	0	220
1563318177	115609	0	220
1563318237	115609	0	220
1563318297	115609	0	219
1563318357	115609	0	219
1563318417	115609	0	219
1563318477	115609	0	218
1563318537	115609	0	219
1563318597	115609	0	218
1563318657	115609	0	219
1563318717	115609	0	219
1563318777	115609	0	219
1563318837	115609	0	220
1563318897	115609	0	219
1563318957	115609	643	218
1563319017	115609	1040	217
1563319077	115609	1041	217
1563319137	115609	1048	217
1563319197	115609	1055	218
1563319257	115609	1054	218
1563319317	115609	1043	217
1563319377	115609	947	216
1563319437	115609	0	218
1563319497	115609	0	219
1563319557	115609	0	219
1563319617	115609	0	218
1563319677	115609	0	217
1563319737	115609	0	218
1563319797	115609	0	218
1563319857	115609	0	218
1563319917	115609	0	219
1563319981	115609	0	0
1563320041	115609	0	216
1563320101	115609	0	217
1563320161	115609	0	218
1563320221	115609	0	217
1563320281	115609	0	217
1563320341	115609	0	216
1563320401	115609	256	216
1563320461	115609	1023	215
1563320521	115609	1029	215
1563320581	115609	1027	215
1563320641	115609	11	217
1563320701	115609	0	217
1563320761	115609	0	217
1563320821	115609	0	217
1563320881	115609	0	216
1563320941	115609	0	216
1563321001	115609	0	215
1563321061	115609	0	214
1563321121	115609	0	213
1563321181	115609	0	214
1563321241	115609	0	214
1563321301	115609	0	214
1563321361	115609	0	215
1563321421	115609	0	214
1563321481	115609	0	214
1563321541	115609	0	213
1563321601	115609	0	215
1563321661	115609	0	216
1563321721	115609	0	218
1563321781	115609	0	218
1563321841	115609	0	218
1563321901	115609	0	218
1563321961	115609	0	218
1563322021	115609	0	219
1563322081	115609	0	217
1563322141	115609	0	217
1563322201	115609	0	217
1563322261	115609	0	217
1563322321	115609	0	218
1563322381	115609	0	218
1563322441	115609	0	217
1563322501	115609	0	217
1563322561	115609	0	217
1563322621	115609	0	216
1563322681	115609	0	216
1563322741	115609	0	216
1563322801	115609	0	216
1563322861	115609	0	217
1563322921	115609	0	217
1563322981	115609	0	218
1563323041	115609	0	217
1563323101	115609	0	216
1563323161	115609	0	215
1563323221	115609	0	214
1563323281	115609	0	216
1563323341	115609	0	217
1563323401	115609	0	217
1563323461	115609	0	217
1563323521	115609	0	217
1563323582	115609	0	216
1563323642	115609	0	217
1563323702	115609	0	217
1563323762	115609	0	218
1563323822	115609	0	218
1563323882	115609	0	217
1563323942	115609	0	217
1563324002	115609	0	217
1563324062	115609	0	217
1563324122	115609	0	217
1563324182	115609	0	217
1563324242	115609	0	218
1563324302	115609	845	217
1563324362	115609	1039	217
1563324422	115609	1041	217
1563324482	115609	308	218
1563324542	115609	0	218
1563324602	115609	0	219
1563324662	115609	0	219
1563324722	115609	0	218
1563324782	115609	0	218
1563324842	115609	0	217
1563324902	115609	0	217
1563324962	115609	0	218
1563325022	115609	0	219
1563325082	115609	0	220
1563325142	115609	0	219
1563325202	115609	0	221
1563325262	115609	0	220
1563325322	115609	0	220
1563325382	115609	0	219
1563325442	115609	0	219
1563325502	115609	0	219
1563325562	115609	0	219
1563325622	115609	0	218
1563325682	115609	0	219
1563325742	115609	0	218
1563325802	115609	0	217
1563325862	115609	0	218
1563325922	115609	0	217
1563325982	115609	0	216
1563326042	115609	0	214
1563326102	115609	0	214
1563326162	115609	0	213
1563326222	115609	0	215
1563326282	115609	0	216
1563326342	115609	0	217
1563326402	115609	0	218
1563326462	115609	0	217
1563326522	115609	0	215
1563326582	115609	0	215
1563326642	115609	0	216
1563326702	115609	0	217
[truncated: 8,000 more rows]
